# Supplementary material for: Protocol for development and validation of a clinical prediction model for adverse pregnancy outcomes in women with gestational diabetes
Source: HighWire-hosted journal article supplement (doi:10.1136/bmjopen-2020-038845), 2020-11-01
Supplement: bmjopen-2020-038845supp001_data_supplement.pdf [file bmjopen-2020-038845supp001_data_supplement.pdf]

Table S1. Potential outcomes to be predicted identified in a systematic review and review of other relevant literature.

| Outcomes                                             | Models for pregnancy complications in women with GDM |                                 |                                            |                                     |                                      | Core outcome set for studies of GDM Treatment <sup>1</sup>           | Hyperglycaemia and Adverse Pregnancy Outcomes study <sup>2</sup> | Model for insulin therapy initiation <sup>3</sup> |
|------------------------------------------------------|------------------------------------------------------|---------------------------------|--------------------------------------------|-------------------------------------|--------------------------------------|----------------------------------------------------------------------|------------------------------------------------------------------|---------------------------------------------------|
|                                                      | McIntyre <i>et al.</i> <sup>4</sup>                  | Park <i>et al.</i> <sup>5</sup> | Phaloprakarn and Tangjitgamol <sup>6</sup> | Pintaudi <i>et al.</i> <sup>7</sup> | Tomlinson <i>et al.</i> <sup>8</sup> |                                                                      |                                                                  |                                                   |
| <b>Outcomes to be predicted</b>                      |                                                      |                                 |                                            |                                     |                                      |                                                                      |                                                                  |                                                   |
| Birth of LGA neonate (> 90 <sup>th</sup> percentile) | x                                                    | x                               |                                            | x                                   | x                                    | x                                                                    | 1 <sup>o</sup>                                                   | x                                                 |
| HDP                                                  |                                                      | x (GH, PE)                      | x (PE)                                     |                                     |                                      | x                                                                    | 2 <sup>o</sup> (PE)                                              |                                                   |
| Shoulder dystocia                                    | x <sup>g</sup>                                       |                                 |                                            | x                                   |                                      |                                                                      | 2 <sup>o</sup> (shoulder dystocia or birth injury)               | x                                                 |
| Nerve palsy                                          |                                                      |                                 |                                            |                                     |                                      |                                                                      | 2 <sup>o</sup> (shoulder dystocia or birth injury)               |                                                   |
| Bone fracture                                        |                                                      |                                 |                                            |                                     |                                      |                                                                      | 2 <sup>o</sup> (shoulder dystocia or birth injury)               |                                                   |
| Perinatal (fetal and neonatal) death                 |                                                      |                                 |                                            | x                                   |                                      | x (neonatal death, stillbirth)                                       |                                                                  |                                                   |
| Neonatal hypoglycaemia                               | x                                                    | x                               |                                            | x                                   |                                      | x                                                                    | 1 <sup>o</sup> (clinical)                                        | x                                                 |
| Requirement for insulin therapy                      |                                                      | x                               |                                            |                                     |                                      | x (Requirement & type of pharmacological therapy for hyperglycaemia) |                                                                  |                                                   |

| Outcomes excluded from prediction      |                |   |  |   |  |                   |                                         |                                |
|----------------------------------------|----------------|---|--|---|--|-------------------|-----------------------------------------|--------------------------------|
| Birth weight                           |                |   |  |   |  | x                 |                                         |                                |
| Preterm birth                          |                |   |  |   |  | x                 | 2° (delivery before 27 weeks gestation) | x (Early delivery, < 37 weeks) |
| Adherence to the intervention          |                |   |  |   |  | x                 |                                         |                                |
| GWG                                    |                |   |  |   |  | x                 |                                         |                                |
| Caesarean delivery                     | x <sup>#</sup> |   |  |   |  | x (Mode of birth) | 1° (primary caesarean delivery)         | x                              |
| SGA (<10 <sup>th</sup> percentile)     |                |   |  | x |  | x                 |                                         | x                              |
| GA at birth                            |                |   |  |   |  | x                 |                                         |                                |
| Neonatal jaundice                      |                | x |  | x |  |                   | 2° (hyperbilirubinaemia)                | x                              |
| Neonatal adiposity                     | x              |   |  |   |  |                   |                                         |                                |
| Neonatal hyperinsulinaemia             | x              | x |  |   |  |                   | 1°                                      |                                |
| Admission to the NICU                  |                | x |  | x |  |                   | 2°                                      |                                |
| Malformations                          |                |   |  | x |  |                   |                                         |                                |
| Neonatal hypocalcaemia                 |                |   |  | x |  |                   |                                         |                                |
| Neonatal respiratory distress syndrome |                |   |  | x |  |                   |                                         |                                |
| Cord-blood serum C-peptide level       |                |   |  |   |  |                   | x                                       |                                |

|                           |  |  |  |  |  |  |  |  |
|---------------------------|--|--|--|--|--|--|--|--|
| above the 90th percentile |  |  |  |  |  |  |  |  |
|---------------------------|--|--|--|--|--|--|--|--|

Abbreviations: GDM, gestational diabetes; COS, core outcome set; LGA, large-for-gestational age; HDP, hypertensive disorders of pregnancy; PE, preeclampsia, GH, gestational hypertension; 2°, primary outcome; 2°, secondary outcome; GWG, gestational weight gain; GA, gestational age; SGA, small-for-gestational age; OGTT, oral glucose tolerance test; NICU, neonatal intensive care unit.

REFERENCES

1. Egan AM, Bogdanet D, Griffin TP, et al. A core outcome set for studies of gestational diabetes mellitus prevention and treatment. *Diabetologia* 2020 doi: 10.1007/s00125-020-05123-6 [published Online First: 2020/03/21]

2. Hapo Study Cooperative Research Group, Metzger BE, Lowe LP, et al. Hyperglycemia and adverse pregnancy outcomes. *N Engl J Med* 2008;358(19):1991-2002. doi: 10.1056/NEJMoa0707943 [published Online First: 2008/05/09]

3. Barnes RA, Wong T, Ross GP, et al. A novel validated model for the prediction of insulin therapy initiation and adverse perinatal outcomes in women with gestational diabetes mellitus. *Diabetologia* 2016;59(11):2331-38. doi: 10.1007/s00125-016-4047-8 [published Online First: 2016/07/10]

4. McIntyre HD, Gibbons KS, Lowe J, et al. Development of a risk engine relating maternal glycemia and body mass index to pregnancy outcomes. *Diabetes Res Clin Pract* 2018;139:331-38. doi: 10.1016/j.diabres.2018.02.036 [published Online First: 2018/03/20]

5. Park JS, Kim DW, Kwon JY, et al. Development of a Screening Tool for Predicting Adverse Outcomes of Gestational Diabetes Mellitus: A Retrospective Cohort Study. *Medicine (Baltimore)* 2016;95(1):e2204. doi: 10.1097/MD.0000000000002204 [published Online First: 2016/01/07]

6. Phaloprakarn C, Tangjitgamol S. Risk assessment for preeclampsia in women with gestational diabetes mellitus. *J Perinat Med* 2009;37(6):617-21. doi: 10.1515/JPM.2009.108 [published Online First: 2009/07/14]

7. Pintaudi B, Fresa R, Dalfra M, et al. The risk stratification of adverse neonatal outcomes in women with gestational diabetes (STRONG) study. *Acta Diabetol* 2018;55(12):1261-73. doi: 10.1007/s00592-018-1208-x [published Online First: 2018/09/18]

8. Tomlinson TM, Mostello DJ, Lim KH, et al. Fetal overgrowth in pregnancies complicated by diabetes: development of a clinical prediction index. *Arch Gynecol Obstet* 2018;298(1):67-74. doi: 10.1007/s00404-018-4758-9 [published Online First: 2018/04/28]
