# Supplementary material for: Protocol for development and validation of a clinical prediction model for adverse pregnancy outcomes in women with gestational diabetes
Source: HighWire-hosted journal article supplement (doi:10.1136/bmjopen-2020-038845), 2020-11-01
Supplement: bmjopen-2020-038845supp002_data_supplement.pdf [file bmjopen-2020-038845supp002_data_supplement.pdf]

Table S2. The rationale for outcomes to be predicted.

| Outcomes                             | Clinical rationale for inclusion/ exclusion                                                                                                                                                                                                                                                                                                                                                                                                                                                                                                        |
|--------------------------------------|----------------------------------------------------------------------------------------------------------------------------------------------------------------------------------------------------------------------------------------------------------------------------------------------------------------------------------------------------------------------------------------------------------------------------------------------------------------------------------------------------------------------------------------------------|
| Outcomes to be predicted             |                                                                                                                                                                                                                                                                                                                                                                                                                                                                                                                                                    |
| LGA (> 90 <sup>th</sup> percentile)  | Excess fetal growth is the central adverse pregnancy outcome in pregnancies affected by GDM with many mechanisms implicated including but not limited to the hyperglycaemia-fetal hyperinsulinaemia hypothesis. <sup>1</sup> This adverse outcome is also upstream on the causal pathway to other clinically relevant complications, including those related to difficulties at delivery. LGA will be used rather than macrosomia as it is a measure of birth weight corrected for gestational age and is also less variably defined. <sup>2</sup> |
| HDP                                  | Significant association with GDM and if at high-risk, then closer monitoring during pregnancy may be required.                                                                                                                                                                                                                                                                                                                                                                                                                                     |
| Shoulder dystocia                    | Associated with GDM and clinically significant.                                                                                                                                                                                                                                                                                                                                                                                                                                                                                                    |
| Nerve palsy                          | May be associated with GDM and clinically significant.                                                                                                                                                                                                                                                                                                                                                                                                                                                                                             |
| Bone fracture                        | May be associated with GDM and clinically significant.                                                                                                                                                                                                                                                                                                                                                                                                                                                                                             |
| Perinatal (fetal and neonatal) death | Rare but of utmost clinical significance.                                                                                                                                                                                                                                                                                                                                                                                                                                                                                                          |
| Neonatal hypoglycaemia               | This is the central marker of the maladaptive metabolic response of the neonate exposed to hyperglycaemia in utero as per the hyperglycaemia-fetal hyperinsulinaemia hypothesis. <sup>3</sup> Severe cases requiring intravenous treatment are likely to be most clinically relevant.                                                                                                                                                                                                                                                              |
| The requirement for insulin therapy  | A treatment for GDM that reduces the risk of some adverse outcomes.                                                                                                                                                                                                                                                                                                                                                                                                                                                                                |
| Outcomes excluded from prediction    |                                                                                                                                                                                                                                                                                                                                                                                                                                                                                                                                                    |
| Preterm birth                        | Not directly related to GDM and may be more related to IUGR; strongly clinician-driven.                                                                                                                                                                                                                                                                                                                                                                                                                                                            |
| Adherence to the intervention        | Possible predictor.                                                                                                                                                                                                                                                                                                                                                                                                                                                                                                                                |
| GWG                                  | Possible predictor.                                                                                                                                                                                                                                                                                                                                                                                                                                                                                                                                |
| Caesarean delivery                   | Highly clinician-driven and institution dependent.                                                                                                                                                                                                                                                                                                                                                                                                                                                                                                 |
| SGA (<10 <sup>th</sup> percentile)   | Not directly related to GDM, more related to IUGR.                                                                                                                                                                                                                                                                                                                                                                                                                                                                                                 |
| GA at birth                          | May be clinician-driven.                                                                                                                                                                                                                                                                                                                                                                                                                                                                                                                           |

|                                                            |                                                                                                                                                                                                        |
|------------------------------------------------------------|--------------------------------------------------------------------------------------------------------------------------------------------------------------------------------------------------------|
| Neonatal jaundice                                          | Only severe cases are clinically relevant and may be more closely related to prematurity rather than the maternal hyperglycaemia of GDM.                                                               |
| Neonatal adiposity                                         | Not routinely assessed in clinical practice.                                                                                                                                                           |
| Neonatal hyperinsulinaemia                                 | Neonatal hypoglycaemia is a more meaningful clinical outcome.                                                                                                                                          |
| Admission to the NICU                                      | Highly clinician-driven and institution dependent.                                                                                                                                                     |
| Malformations                                              | Associated with pre-gestational diabetes and less relevant in gestational diabetes.                                                                                                                    |
| Neonatal hypocalcaemia                                     | As its severity is related to the level of hyperglycaemia unlike in pre-gestational diabetes, it is rarely seen in GDM and if present is usually asymptomatic and resolves spontaneously. <sup>4</sup> |
| Neonatal respiratory distress syndrome                     | Only severe cases are clinically relevant and may be more closely related to prematurity rather than hyperglycaemia. <sup>5</sup>                                                                      |
| Cord-blood serum C-peptide level above the 90th percentile | Not routinely assessed in clinical practice and clinical relevance unclear.                                                                                                                            |

Abbreviations: GDM, gestational diabetes; LGA, large-for-gestational-age; HDP, hypertensive disorders of pregnancy; GWG, gestational weight gain; GA, gestational age; SGA, small-for-gestational-age; OGTT, oral glucose tolerance test; NICU, neonatal intensive care unit.

## REFERENCES

1. Pedersen J. Diabetes and pregnancy: blood sugar of newborn infants [doctoral thesis]. Danish Science Press, 1952.
2. Henriksen T. The macrosomic fetus: a challenge in current obstetrics. *Acta Obstet Gynecol Scand* 2008;87(2):134-45. doi: 10.1080/00016340801899289 [published Online First: 2008/01/31]
3. Pedersen J. Weight and length at birth of infants of diabetic mothers. *Acta Endocrinol (Copenh)* 1954;16(4):330-42. [published Online First: 1954/08/01]
4. Cordero L, Treuer SH, Landon MB, et al. Management of infants of diabetic mothers. *Arch Pediatr Adolesc Med* 1998;152(3):249-54. doi: 10.1001/archpedi.152.3.249 [published Online First: 1998/04/08]
5. Werner EF, Romano ME, Rouse DJ, et al. Association of Gestational Diabetes Mellitus With Neonatal Respiratory Morbidity. *Obstet Gynecol* 2019;133(2):349-53. doi: 10.1097/AOG.0000000000003053 [published Online First: 2019/01/12]
