# Supplementary material for: Protocol for development and validation of a clinical prediction model for adverse pregnancy outcomes in women with gestational diabetes
Source: HighWire-hosted journal article supplement (doi:10.1136/bmjopen-2020-038845), 2020-11-01
Supplement: bmjopen-2020-038845supp003_data_supplement.pdf [file bmjopen-2020-038845supp003_data_supplement.pdf]

Table S3. Predictors selected for final related models.

| Candidate predictors for modelling                   | Models for pregnancy complications in women with GDM included in systematic review |                                 |                                            |                                     |                                      | Model for GDM Diagnosis <sup>1</sup> | Model for insulin therapy initiation <sup>2</sup> |
|------------------------------------------------------|------------------------------------------------------------------------------------|---------------------------------|--------------------------------------------|-------------------------------------|--------------------------------------|--------------------------------------|---------------------------------------------------|
|                                                      | McIntyre <i>et al.</i> <sup>3</sup>                                                | Park <i>et al.</i> <sup>4</sup> | Phaloprakarn and Tangjitgamol <sup>5</sup> | Pintaudi <i>et al.</i> <sup>6</sup> | Tomlinson <i>et al.</i> <sup>7</sup> |                                      |                                                   |
| Age                                                  | x                                                                                  |                                 |                                            |                                     | x                                    | x                                    | x                                                 |
| Parity                                               | x                                                                                  |                                 |                                            |                                     |                                      |                                      |                                                   |
| Gestational age of diagnosis                         |                                                                                    |                                 | x                                          |                                     |                                      |                                      | x                                                 |
| Fasting glucose from diagnostic OGTT                 | x                                                                                  | x                               |                                            |                                     | x                                    | NA                                   | x                                                 |
| 1-hour glucose from diagnostic OGTT                  | x                                                                                  |                                 |                                            |                                     |                                      | NA                                   |                                                   |
| 2-hour glucose from diagnostic OGTT                  | x                                                                                  |                                 |                                            |                                     |                                      | NA                                   |                                                   |
| Ethnicity                                            |                                                                                    |                                 |                                            |                                     |                                      | x                                    |                                                   |
| Family history of diabetes                           |                                                                                    |                                 |                                            | x                                   |                                      | x                                    | x                                                 |
| Gestational weight gain                              |                                                                                    |                                 |                                            |                                     | x                                    |                                      |                                                   |
| Previous GDM                                         |                                                                                    |                                 |                                            |                                     |                                      | x                                    | x                                                 |
| History of macrosomia                                |                                                                                    |                                 |                                            |                                     | x                                    |                                      |                                                   |
| BMI                                                  | x (at time of OGTT)                                                                | x (at time of diagnosis)        | x (first trimester)                        | x (pre-pregnancy)                   |                                      | x                                    | x                                                 |
| Height                                               | x                                                                                  |                                 |                                            |                                     |                                      |                                      |                                                   |
| Poor glycaemic control                               |                                                                                    | x                               | x                                          |                                     |                                      |                                      |                                                   |
| Enlarged fetal abdominal circumference on ultrasound |                                                                                    |                                 |                                            |                                     | x                                    |                                      |                                                   |
| HbA1c at diagnosis                                   |                                                                                    |                                 |                                            |                                     |                                      |                                      | x                                                 |

Abbreviations: GDM, gestational diabetes; OGTT, oral glucose tolerance test; BMI, body mass index.

## REFERENCES

1. Teede HJ, Harrison CL, Teh WT, et al. Gestational diabetes: Development of an early risk prediction tool to facilitate opportunities for prevention. *Aust N Z J Obstet Gynaecol* 2011;51(6):499-504. doi: 10.1111/j.1479-828X.2011.01356.x
2. Barnes RA, Wong T, Ross GP, et al. A novel validated model for the prediction of insulin therapy initiation and adverse perinatal outcomes in women with gestational diabetes mellitus. *Diabetologia* 2016;59(11):2331-38. doi: 10.1007/s00125-016-4047-8 [published Online First: 2016/07/10]
3. McIntyre HD, Gibbons KS, Lowe J, et al. Development of a risk engine relating maternal glycemia and body mass index to pregnancy outcomes. *Diabetes Res Clin Pract* 2018;139:331-38. doi: 10.1016/j.diabres.2018.02.036 [published Online First: 2018/03/20]
4. Park JS, Kim DW, Kwon JY, et al. Development of a Screening Tool for Predicting Adverse Outcomes of Gestational Diabetes Mellitus: A Retrospective Cohort Study. *Medicine (Baltimore)* 2016;95(1):e2204. doi: 10.1097/MD.0000000000002204 [published Online First: 2016/01/07]
5. Phaloprakarn C, Tangjitgamol S. Risk assessment for preeclampsia in women with gestational diabetes mellitus. *J Perinat Med* 2009;37(6):617-21. doi: 10.1515/JPM.2009.108 [published Online First: 2009/07/14]
6. Pintaudi B, Fresa R, Dalfra M, et al. The risk stratification of adverse neonatal outcomes in women with gestational diabetes (STRONG) study. *Acta Diabetol* 2018;55(12):1261-73. doi: 10.1007/s00592-018-1208-x [published Online First: 2018/09/18]
7. Tomlinson TM, Mostello DJ, Lim KH, et al. Fetal overgrowth in pregnancies complicated by diabetes: development of a clinical prediction index. *Arch Gynecol Obstet* 2018;298(1):67-74. doi: 10.1007/s00404-018-4758-9 [published Online First: 2018/04/28]
